# Supplementary material
Source: Springer Nature journal article supplement (https://www.springermedizin.de/resource/supplementary/13223_2010_96_MOESM1_ESM.pdf/9597190)

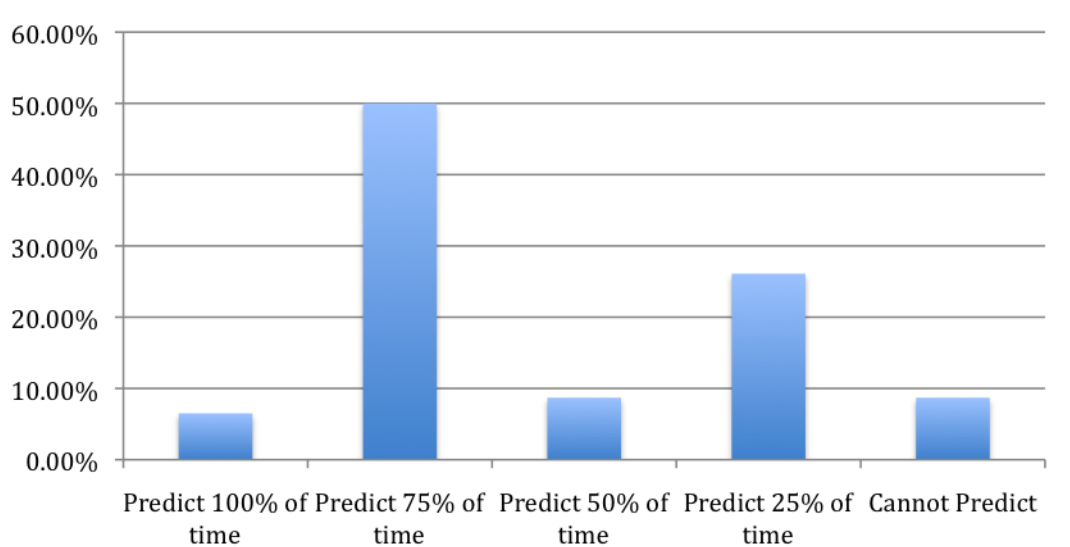

Supplement: MOESM1 [file 9597190]
